# Supplementary material for: Internet addicts show impaired interference control ability: Evidence from Event- related potentials and oscillatory brain responses
Source: Research Square preprint supplement (doi:10.21203/rs.3.rs-3869933/v1), 2024-01-23
Supplement: Supplementary file 1 [file 091bbcb8535f5d590c1a0ec1.docx]

**Table 1. Demographic parameters (means and SD)**

| Participant groups  Tasks | IAD | HC |
| --- | --- | --- |
| Age | 23.50 (4.78) | 24.60 (4.21) |
| IAT | 75.36 (5.18) | 28.05 (5.65) |
| Impulsivity | 43.95 (7.11) | 37.05 (5.20) |
